# Supplementary material
Source: PubMed Central journal article supplement (PMC3329131)
Supplement: NIHMS314695-supplement-supplementary_material.pdf [file NIHMS314695-supplement-supplementary_material.pdf]

# Supplemental Material for “Bayesian Kernel Mixtures for Counts”

Antonio Canale\* & David B. Dunson†

## A. PROOF OF THEOREMS

To prove Lemma 1 we have first to ensure the existence of at least one element in  $\mathcal{L}$  for every  $p \in \mathcal{C}$ . This is done in the following Lemma.

**Lemma.** *For every count measure  $p_0 \in \mathcal{C}$  and rounding function  $g(\cdot)$  defined in (3), there exists at least one  $f_0 \in \mathcal{L}$  such that  $g(f_0) = p_0$ .*

*Proof.* The lemma is trivially proved by defining  $f_0$  as a step function of the form

$$f_0(x) = \frac{p_0(0)}{a_1 - b} \mathbb{I}_{[b, a_1)}(x) + \sum_{h=1}^{\infty} \frac{p_0(j)}{a_{j+1} - a_h} \mathbb{I}_{[a_j, a_{j+1})}(x),$$

where  $\mathbb{I}_A(x)$  is 1 iff  $x \in A$  and  $b$  is an arbitrary number such that  $(b, a_1)$  is in the domain of  $f$ . □

## B. ALGEBRAIC DETAILS TO CENTER THE ROUNDED MIXTURE OF GAUSSIANS PRIOR

Assuming the prior specified in Section 2.2, with

$$P_0 = N(\mu; \mu_0, \kappa\tau^{-1})Ga(\tau; \nu/2, \nu/2)$$

---

\*Dip. Scienze Statistiche, Università di Padova, 35121 Padova, Italy ([canale@stat.unipd.it](mailto:canale@stat.unipd.it))

†Dept. Statistical Science, Duke University, Durham, NC 27708, USA ([dunson@stat.duke.edu](mailto:dunson@stat.duke.edu))

we have

$$\begin{aligned}
\mathbb{E}\{F(a_j)\} &= \mathbb{E}\left\{\sum_{h=1}^{\infty}\pi_h\Phi(a_j;\mu_h,\tau_h^{-1})\right\} \\
&= \int_{R\times R^+}\Phi(a_j;\mu,\tau^{-1})N(\mu;\mu_0,\tau^{-1}\kappa)Ga(\tau;\nu/2,\nu/2)d\mu d\tau \\
&= \int_0^\infty\int_{-\infty}^\infty\int_{-\infty}^{a_j}N(y^*;\mu,\tau^{-1})N(\mu;\mu_0,\tau^{-1}\kappa)Ga(\tau;\nu/2,\nu/2)d\mu d\tau dy^* \quad (\text{A.1})
\end{aligned}$$

Marginalizing out  $\mu$  from (A.1) we get

$$\mathbb{E}\{F(a_j)\} = \int_{-\infty}^{a_j}\int_0^\infty N(y^*;\mu_0,(\kappa+1)/\tau)Ga(\tau;\nu/2,\nu/2)d\tau dy^*.$$

while marginalizing out  $\tau$  we obtain

$$\mathbb{E}\{F(a_j)\} = \int_{-\infty}^{a_j}t_\nu(y^*;\mu_0,\kappa+1)dy^*$$

that gives equation (5).

To obtain equation (6) we need to compute the second moment of  $F_D(a_j, a_{j+1})$  as

$$\begin{aligned}
\mathbb{E}\{F_D(a_j, a_{j+1})^2\} &= \mathbb{E}\left\{\left(\sum_{h=1}^{\infty}\pi_h\Phi_D(a_j, a_{j+1};\mu_h,\tau_h^{-1})\right)^2\right\} \\
&= \sum_{h=1}^{\infty}\mathbb{E}\left\{\left(\pi_h\Phi_D(a_j, a_{j+1};\mu_h,\tau_h^{-1})\right)^2\right\} + \\
&\quad + 2\sum_{k\neq l}\mathbb{E}\left\{\pi_k\pi_l\Phi_D(a_j, a_{j+1};\mu_k,\tau_k^{-1})\Phi_D(a_j, a_{j+1};\mu_l,\tau_l^{-1})\right\} \\
&= \sum_{h=1}^{\infty}\mathbb{E}\{\pi_h^2\}\mathbb{E}\{\Phi_D(a_j, a_{j+1};\mu_h,\tau_h^{-1})^2\} + \\
&\quad + 2\sum_{k\neq l}\mathbb{E}\{\pi_k\pi_l\}\mathbb{E}\{\Phi_D(a_j, a_{j+1};\mu_k,\tau_k^{-1})\Phi_D(a_j, a_{j+1};\mu_l,\tau_l^{-1})\}.
\end{aligned}$$

Using the stick-breaking construction of the  $\pi_h$  and the results on the variance of the beta

distribution we have

$$\mathbb{E}\{F_D(a_j, a_{j+1})^2\} = \frac{1}{\alpha + 1} \mathbb{E} \{ \Phi_D(a_j, a_{j+1}; \mu, \tau^{-1})^2 \} + \frac{\alpha}{\alpha + 1} \mathbb{E} \{ \Phi_D(a_j, a_{j+1}; \mu, \tau^{-1}) \}^2$$

where the expectations are with respect to  $(\mu, \tau) \sim P_0$ . This leads to

$$\text{Var}\{p(j)\} = \frac{1}{\alpha + 1} \left[ \mathbb{E} \{ \Phi_D(a_j, a_{j+1}; \mu, \tau^{-1})^2 \} - \mathbb{E} \{ \Phi_D(a_j, a_{j+1}; \mu, \tau^{-1}) \}^2 \right]$$

and hence to equation (6).

### C. SIMULATION STUDY RESULTS

The plots in Figure 7-10 report the results for the empirical coverage of 95% credible intervals for the  $p(j)$ s for all scenarios and sample size used in Section 2.5.

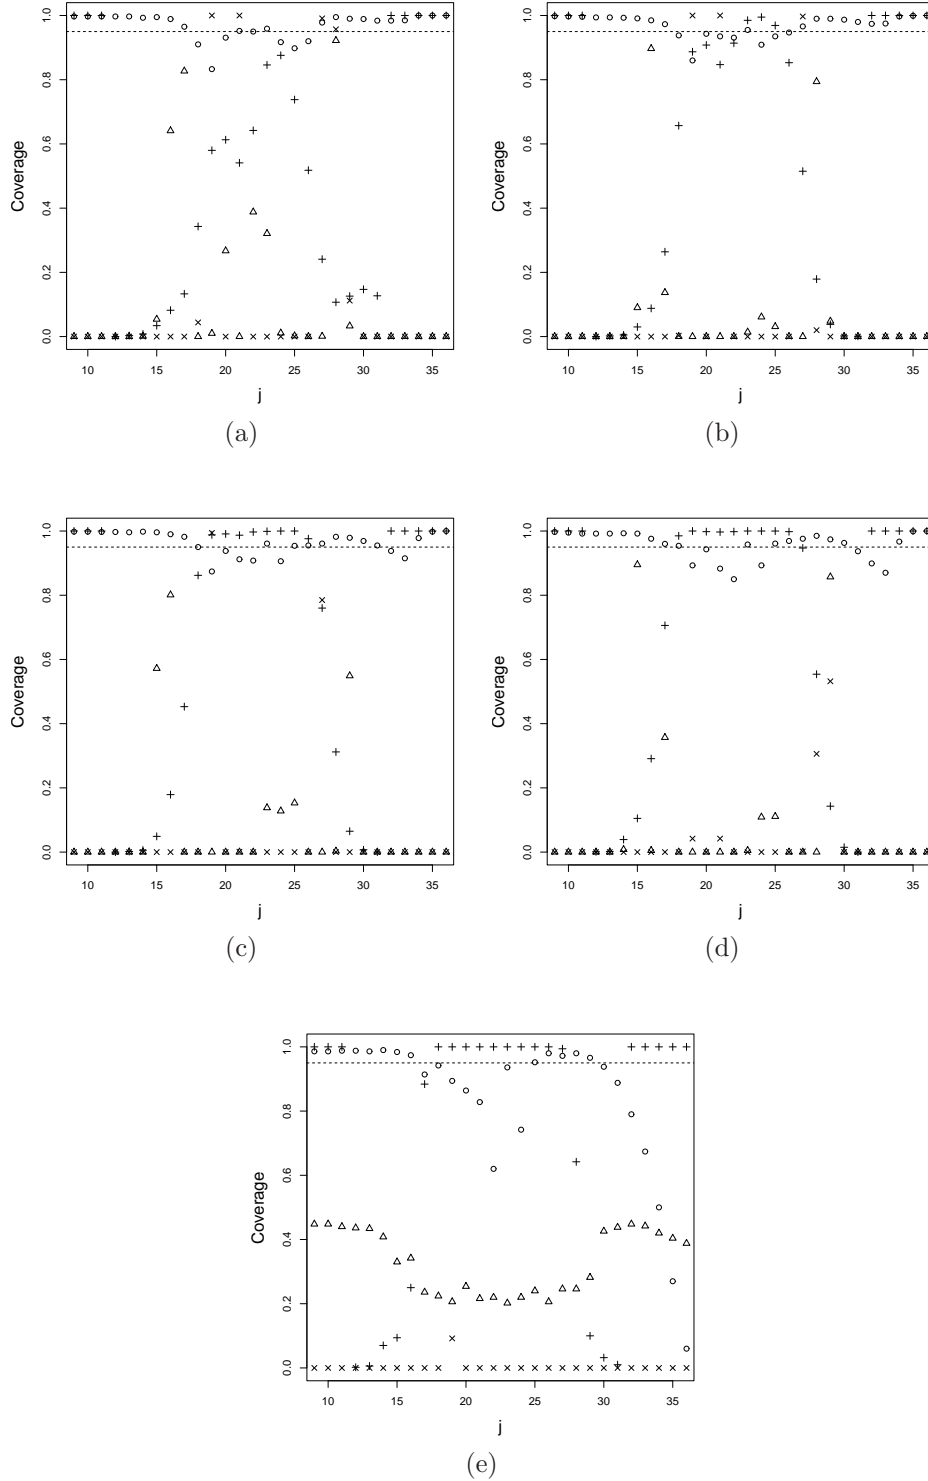

Figure 7: Coverage of 95% credible intervals for  $p(j)$  under the first scenario. Points represent the RMG method, cross-shaped dots the DP with  $\alpha = 1$ , triangles the DP with  $\alpha \sim Ga(1, 1)$  and x-shaped dots the DPM of Poisson. Sample size increases from top to bottom, namely  $n = 10, 25, 50, 100, 300$ .

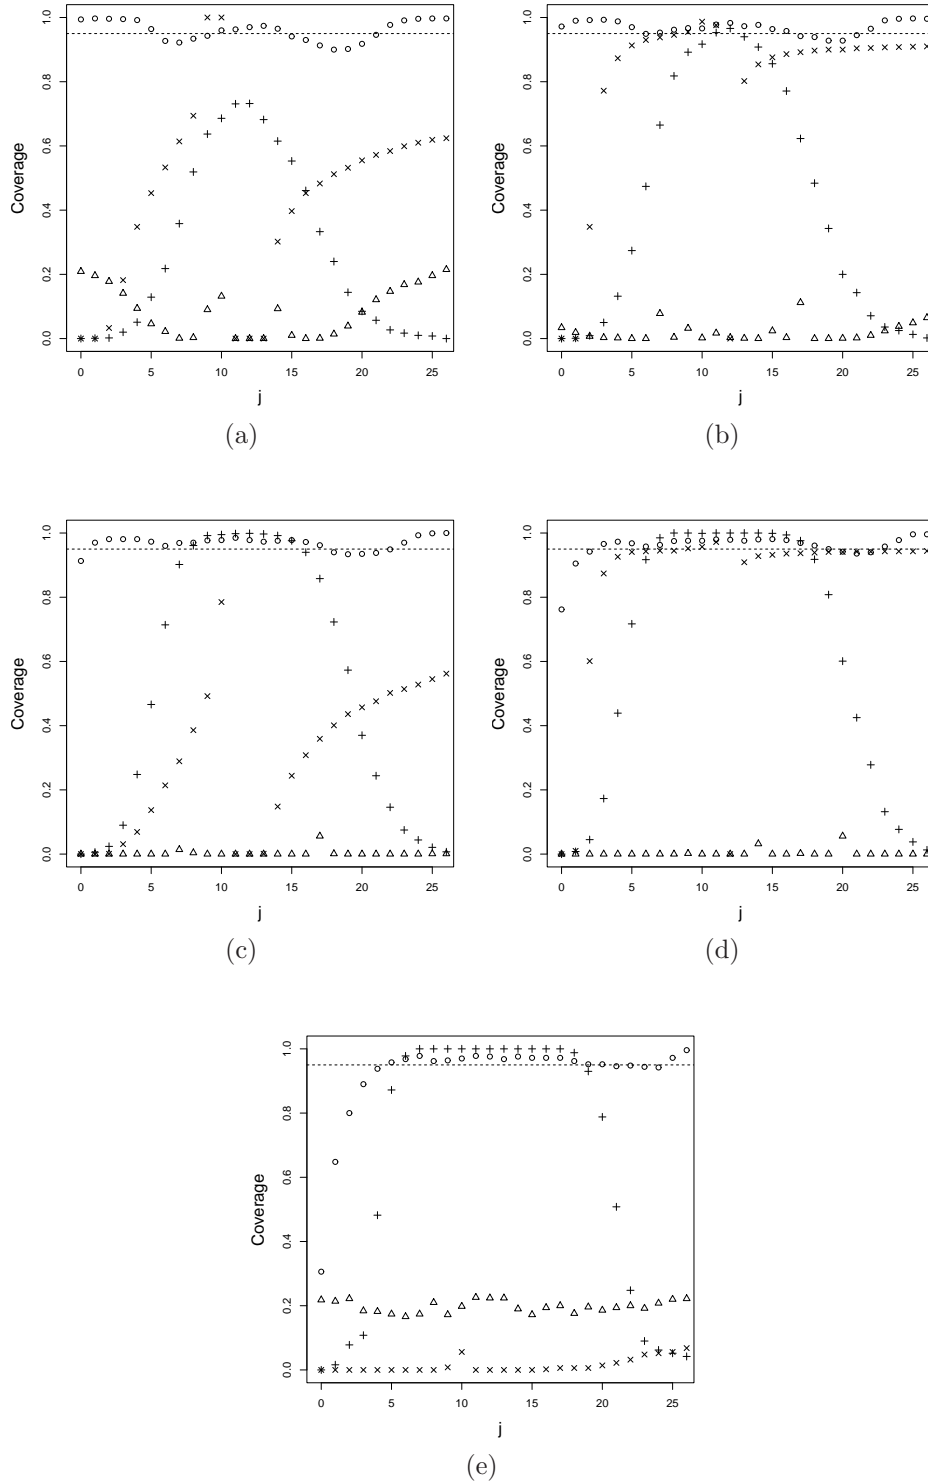

Figure 8: Coverage of 95% credible intervals for  $p(j)$  under the second scenario. Points represent the RMG method, cross-shaped dots the DP with  $\alpha = 1$ , triangles the DP with  $\alpha \sim Ga(1, 1)$  and x-shaped dots the DPM of Poisson. Sample size increases from top to bottom, namely  $n = 10, 25, 50, 100, 300$ .

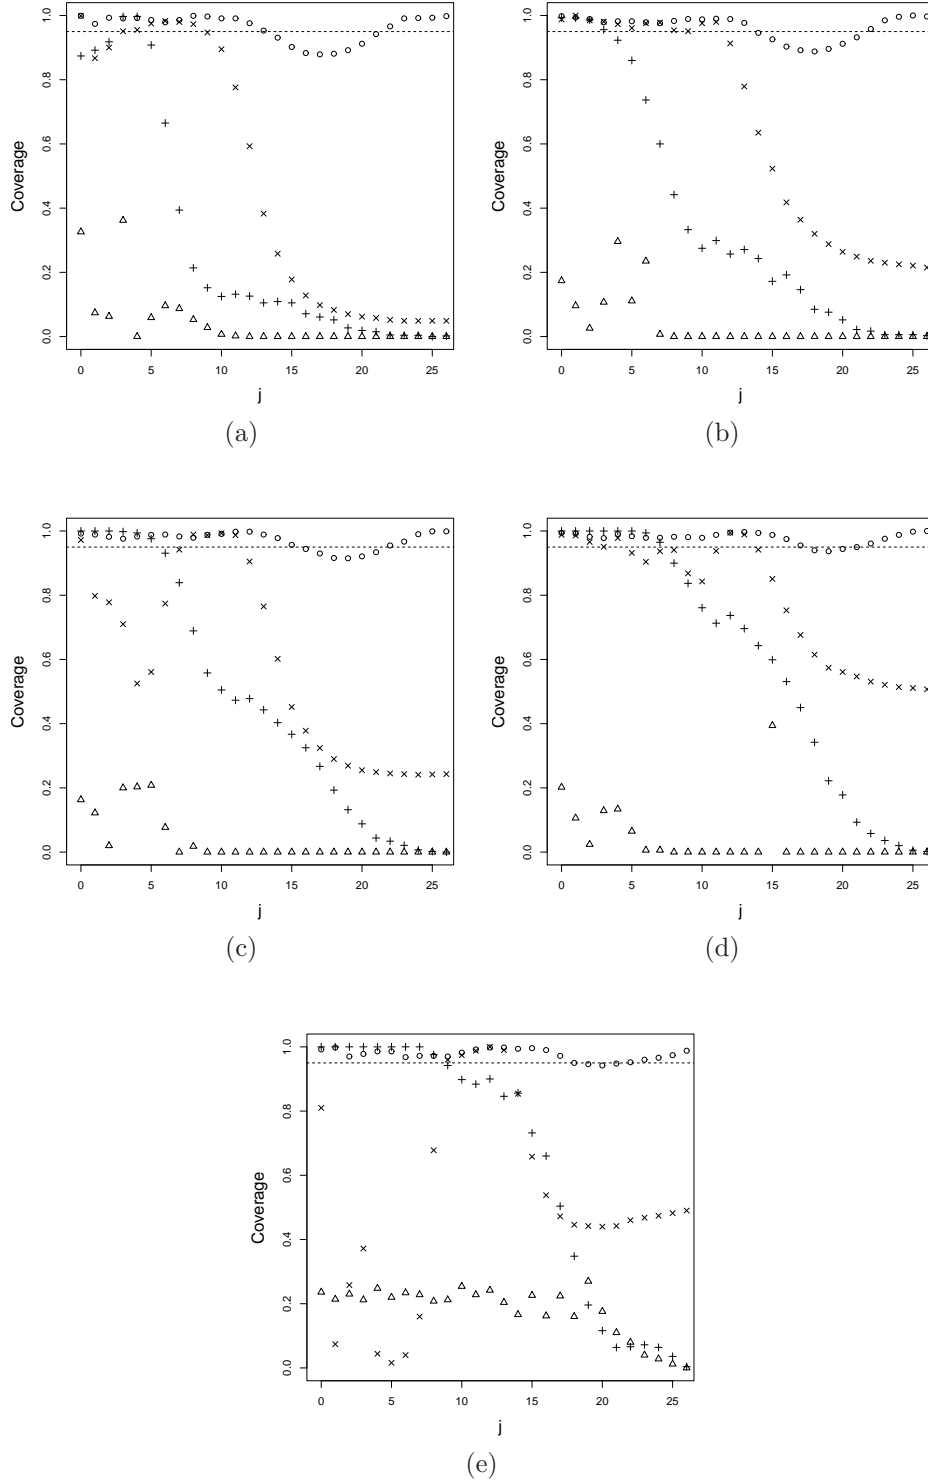

Figure 9: Coverage of 95% credible intervals for  $p(j)$  under the third scenario. Points represent the RMG method, cross-shaped dots the DP with  $\alpha = 1$ , triangles the DP with  $\alpha \sim Ga(1, 1)$  and x-shaped dots the DPM of Poisson. Sample size increases from top to bottom, namely  $n = 10, 25, 50, 100, 300$ .

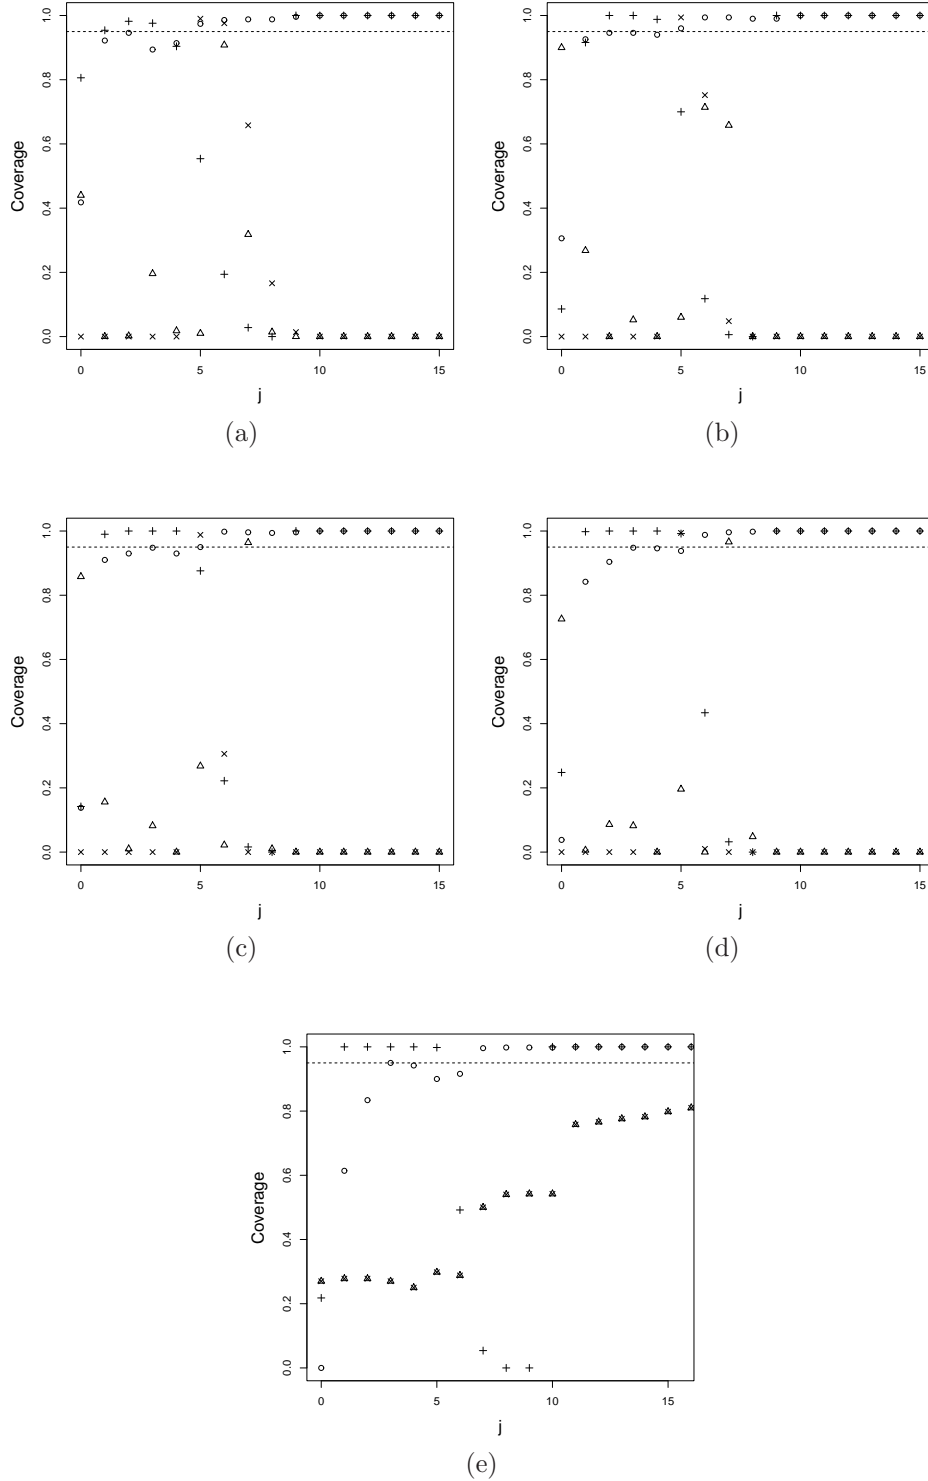

Figure 10: Coverage of 95% credible intervals for  $p(j)$  under the fourth scenario. Points represent the RMG method, cross-shaped dots the DP with  $\alpha = 1$ , triangles the DP with  $\alpha \sim Ga(1, 1)$  and x-shaped dots the DPM of Poisson. Sample size increases from top to bottom, namely  $n = 10, 25, 50, 100, 300$ .
